# Supplementary material for: Li-intercalated CeO2 as an ideal substrate for boosting ammonia synthesis
Source: Royal Society of Chemistry journal article supplement (doi:10.1039/d3dt01457f), 2023-01-01
Supplement: d3dt01457f1.pdf [file d3dt01457f1.pdf]

## Materials and Methods

### 1. Materials.

Cerium dioxide ( $\text{CeO}_2$ ), Iron(III) chloride ( $\text{FeCl}_3$ ), Lithium hydride ( $\text{LiH}$ ), Titanium Dioxide ( $\text{TiO}_2$ ), Magnesium oxide ( $\text{MgO}$ ) and Ruthenium(III) Chloride Hydrate ( $\text{RuCl}_3 \cdot n\text{H}_2\text{O}$ ) were purchased from Aladdin. Anhydrous ethanol (AR grade) and Concentrated sulfuric acid ( $\text{H}_2\text{SO}_4$ ) were purchased from Sinopharm Chemical Reagent Co, Ltd. All chemicals in the experiments were used without further purification. The purities of  $\text{H}_2$ ,  $\text{N}_2$  and Ar are all 99.995%.

### 2. Catalyst preparation

**Ru-CeO<sub>2</sub>/Li:** The commercial  $\text{CeO}_2$  was pre-calcined at 723 K under vacuum for 3 hours to remove the adsorbed impurities. First, 0.0513 g of  $\text{RuCl}_3 \cdot n\text{H}_2\text{O}$  ferric chloride (7 wt%) was dissolved in 40 mL of anhydrous ethanol, then 0.5 g of vacuum treated commercial  $\text{CeO}_2$  was added. After dispersion by ultrasonic, the solution was impregnated and stirred for 5 h in nitrogen atmosphere. The Ru-Ce precursor was obtained by means of rotation evaporation at 313 K and overnight vacuum drying named Ru-CeO<sub>2</sub>.

Take a certain amount of  $\text{LiH}$  and Ru-CeO<sub>2</sub> in the molar ratio of 6:1, grind and mixed them evenly. The mixture was put into a sealable reactor, heated up to 673K at 3.3 K/min in vacuum, and calcined for 2 h. After cooling down to room temperature, the obtained atropurpureus powders were washed with deionized water 6-8 times to completely remove unreacted  $\text{LiH}$ , then dried in vacuum. The catalyst named Ru-CeO<sub>2</sub>/Li. The BET surface area of the as-synthesized Ru-CeO<sub>2</sub>/Li was measured to be 5.89 m<sup>2</sup>g<sup>-1</sup>. The other catalysts with different Ru loaded were named Ru(1%)-CeO<sub>2</sub>/Li, Ru(3%)-CeO<sub>2</sub>/Li, Ru(5%)-CeO<sub>2</sub>/Li, Ru(9%)-CeO<sub>2</sub>/Li respectively.

**CeO<sub>2</sub>/Li:** Take a certain amount of  $\text{LiH}$  and  $\text{CeO}_2$  in the molar ratio of 6:1, grind and mixed them evenly. The mixture was put into a sealable reactor, heated up to 673K at 3.3 K/min in vacuum, and calcined for 2 h. After cooling down to room temperature,

the obtained yellowish-green powders were washed with deionized water 6-8 times to completely remove unreacted LiH, then dried in vacuum. The BET surface area of the as-synthesized CeO<sub>2</sub>/Li was measured to be 15.97 m<sup>2</sup>g<sup>-1</sup>.

**Ru-TiO<sub>2</sub>/Li or Ru-MgO:** The commercial TiO<sub>2</sub> (MgO) was pre-calcined at 723 K under vacuum for 3 hours to remove the adsorbed impurities. The R-@TiO<sub>2</sub>/Li or Ru-MgO was obtained by the similar preparation method to Ru-CeO<sub>2</sub>/Li.

### 3. Characterization

The powder X-ray diffraction (XRD) patterns were performed on a Bruker D8 Advance Davinci X-ray diffractometer with monochromator Cu K $\alpha$  radiation ( $\lambda=1.5418$  Å) from 10° to 80°. Transmission electron microscopy (TEM) images were measured using a Tecnai G2 S-Twin F20 at the acceleration voltage of 200 kV. Scanning electron microscopy (SEM) and energy dispersive X-ray spectroscopy (EDS) analysis were collected using a Helios NanoLab 600I from FEI Company. X-ray photoelectron spectroscopy (XPS) was recorded on a Thermo ESCALAB 250 X-ray photoelectron spectrometer with a monochromated X-ray source (Al K $\alpha$   $h\nu=1486.6$  eV). The energy scale of the spectrometer was calibrated using Au4f<sub>7/2</sub>, Cu2p<sub>3/2</sub>, and Ag3d<sub>5/2</sub> peak positions. The standard deviation for the binding energy (BE) values was 0.1 eV. Argon ion etch for one minute. The electron paramagnetic resonance spectra (EPR) were obtained on a JES-FA 200 EPR spectrometer. The details of the instrumental parameters were as follows: scanning frequency: 9.45 GHz; scanning width: 800 mT; scanning power: 0.998 mW; scanning temperature: 293 K. Fourier transform infrared (FTIR) spectroscopy was performed on a Bruker VERTEX 80 V spectrometer. The Brunauer-Emmett-Teller (BET) surface areas of the samples were measured from the adsorption of N<sub>2</sub> at 77 K by using a Micromeritics ASAP 2020M system. Raman spectra of samples was analyzed on a Renishaw inVia Confocal Raman spectrometer equipped with a solid-state laser of 532 nm as the excitation source. Inductively coupled plasma (ICP) analyses were carried out on an iCAP 7600

ICP-OES instrument. The temperature programmed desorption (TPD) and temperature-programmed reduction (TPR) were performed on an Autochem II 2920 apparatus (Micromeritics, USA). Quantitative samples were usually loaded and pre-treated in an inert gas flow at 400 °C for 1 h. After cooling to 50 °C, the samples were saturated with a flow of 25 mL min<sup>-1</sup> 10% N<sub>2</sub>/He, 10% H<sub>2</sub>/Ar for 60 min. After being purged with inert gas for 1 h, the samples were heated from 50 °C to 400 °C with a heating rate of 10 °C/min under inert gas atmosphere, and the desorbed N<sub>2</sub>, H<sub>2</sub> was determined using a thermal conductivity detector. Ammonia production efficiency was measured by the WFSM-3060 catalyst evaluation device from Tianjin Xianquan Industry and Trade Development Ltd. Ammonia concentration was measured by ion chromatography (IC) on a PIC-10 produced by Qingdao Puren Instrument Ltd.

#### 4. Catalytic Measurements

The catalytic reactions were conducted in a fixed-bed flow system with a gas flow of H<sub>2</sub>:N<sub>2</sub> (3:1) at a flow rate of 60 ml min<sup>-1</sup>. Specifically, a mixture of 15 mg of Ru-CeO<sub>2</sub>/Li and 500 mg of quartz sand (140 mesh) was loaded into the reactor in the glove box and then pre-treated in a stream of H<sub>2</sub>:N<sub>2</sub> (3:1) at 1.0 MPa under a temperature program of 5 K/min up to 673 K and then holding at 673 K for 1 h. After the system is stable, the reaction was monitored under steady-state conditions of temperature (523-773 K) with a flow rate of 60 ml min<sup>-1</sup> under 1.0 MPa. The produced ammonia was trapped in 0.25 mM sulphuric acid solution and the amount of NH<sub>4</sub><sup>+</sup> generated in the solution was determined using an ion chromatograph.

#### 5. Kinetic measurements

All the kinetic measurements were carried out in the fixed-bed flow system with a flow of mixed gas (N<sub>2</sub>, H<sub>2</sub>) under conditions far from equilibrium and the reaction temperature was fixed at 673K,. According to Arrhenius formula:

$$\ln r = \ln k + \alpha \ln P_{\text{NH}_3} + \beta \ln P_{\text{N}_2} + \gamma \ln P_{\text{H}_2}.$$

In the measurement of  $N_2$  reaction order, the partial pressure of  $H_2$  in the reaction gas was kept constant to test the rate of ammonia synthesis under different partial pressure of  $N_2$ . Since the partial pressure of  $NH_3$  in the reaction product is very small, the  $\alpha \ln P_{NH_3}$  term can be ignored, so the above equation can be further transformed into:

$$\ln r = K_1 + \beta \ln P_{N_2}.$$

Meanwhile, the reaction order of  $H_2$  can be measured by

$$\ln r = K_2 + \gamma \ln P_{H_2}.$$

Table S1. Composition of different catalysts (based on ICP measurements)

| Samples                 | Ce:Li (mole:mole) | Ru (wt%) |
|-------------------------|-------------------|----------|
| Ru-CeO <sub>2</sub> /Li | 0.8               | 6.6      |
| CeO <sub>2</sub> /Li    | 0.9               | /        |
| Ru-CeO <sub>2</sub>     | /                 | 6.1      |
| Ru-MgO                  | /                 | 6.3      |

Table S2. Representative works on ammonia synthesis based on Ru-modified catalysts.

| Samples                                   | Rate<br>( $\mu\text{mol g}^{-1} \text{h}^{-1}$ ) | Reaction<br>conditions | sccm<br>( $\text{ml min}^{-1}$ ) | Ref.      |
|-------------------------------------------|--------------------------------------------------|------------------------|----------------------------------|-----------|
| Ru-CeO <sub>2</sub> /LiH                  | 33000                                            | 1MPa, 400 °C           | 60                               | This work |
| Ru/CeO <sub>2</sub> -w                    | 22620                                            | 1MPa, 400 °C           | 60                               | S1        |
| Ru(5%)-Pr <sub>2</sub> O <sub>3</sub>     | 19000                                            | 1MPa, 400 °C           | 60                               | S2        |
| Ru(5%)/CeO <sub>2</sub>                   | 7200                                             | 0.9MPa, 400°C          | 60                               | S2        |
| Ru(1.8%)/LaScSi                           | 1800                                             | 1MPa, 400 °C           | 60                               | S2        |
| Ru(9.1%)-Ba/AC                            | 8285                                             | 1MPa, 400 °C           | 60                               | S3        |
| Ru(6%)-Cs/MgO                             | 12117                                            | 1MPa, 400 °C           | 60                               | S3        |
| Ru(4%)/C12A7:e <sup>-</sup>               | 6089                                             | 1MPa, 400 °C           | 60                               | S3        |
| Ba-Ru(4.8%)-Li/AC                         | 19600                                            | 1MPa, 400 °C           | 60                               | S4        |
| Ru(1%)/CeO <sub>2</sub> -BH               | 5454                                             | 1MPa, 400 °C           | 60                               | S5        |
| Ru(3%)/Ti <sub>0.18</sub> -Ce             | 18912                                            | 0.9MPa, 400°C          | 60                               | S5        |
| Ru(7.8%)/Y <sub>5</sub> Si <sub>3</sub>   | 4100                                             | 1MPa, 400 °C           | 60                               | S6        |
| Ru(3%)/CeO <sub>2</sub>                   | 22075                                            | 1MPa, 400 °C           | 60                               | S7        |
| Ru(5%) NPs/CeO <sub>2</sub>               | 28000                                            | 1MPa, 400 °C           | 60                               | S8        |
| Ru(1.8%)/Ca <sub>2</sub> N:e <sup>-</sup> | 3386                                             | 0.1MPa, 340 °C         | 60                               | S9        |
| Ru(2.0%)/CaH <sub>2</sub>                 | 4002                                             | 0.1MPa, 340 °C         | 60                               | S10       |



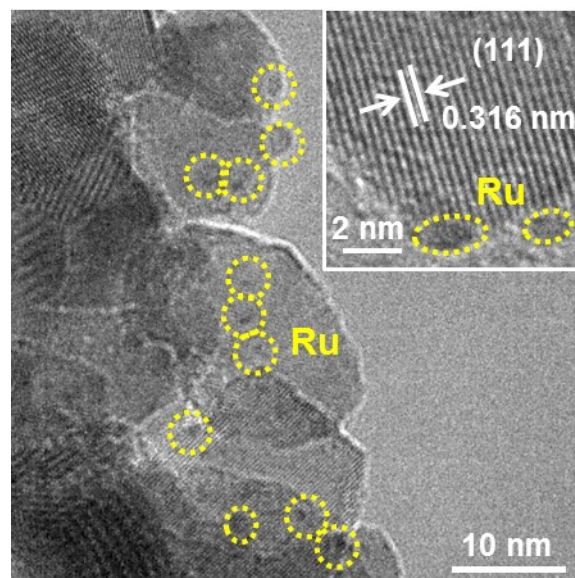

**Figure S1.** HRTEM images of Ru-CeO<sub>2</sub>/Li.

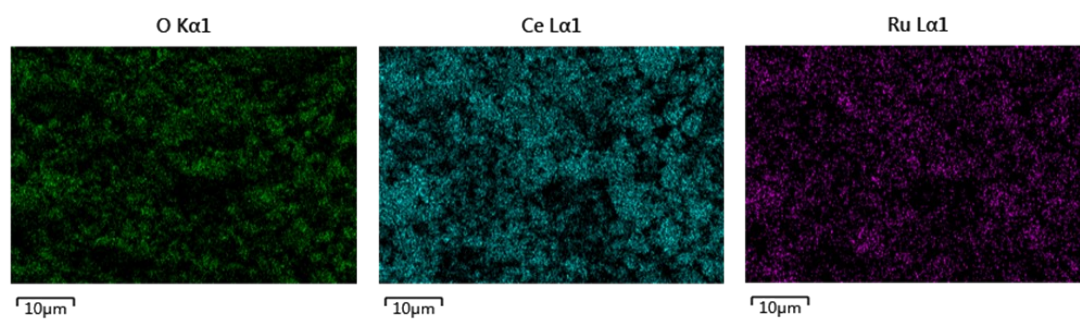

**Figure S2.** SEM-EDX elemental mapping profiles of Ru-CeO<sub>2</sub>/Li for oxygen, cerium and ruthenium.

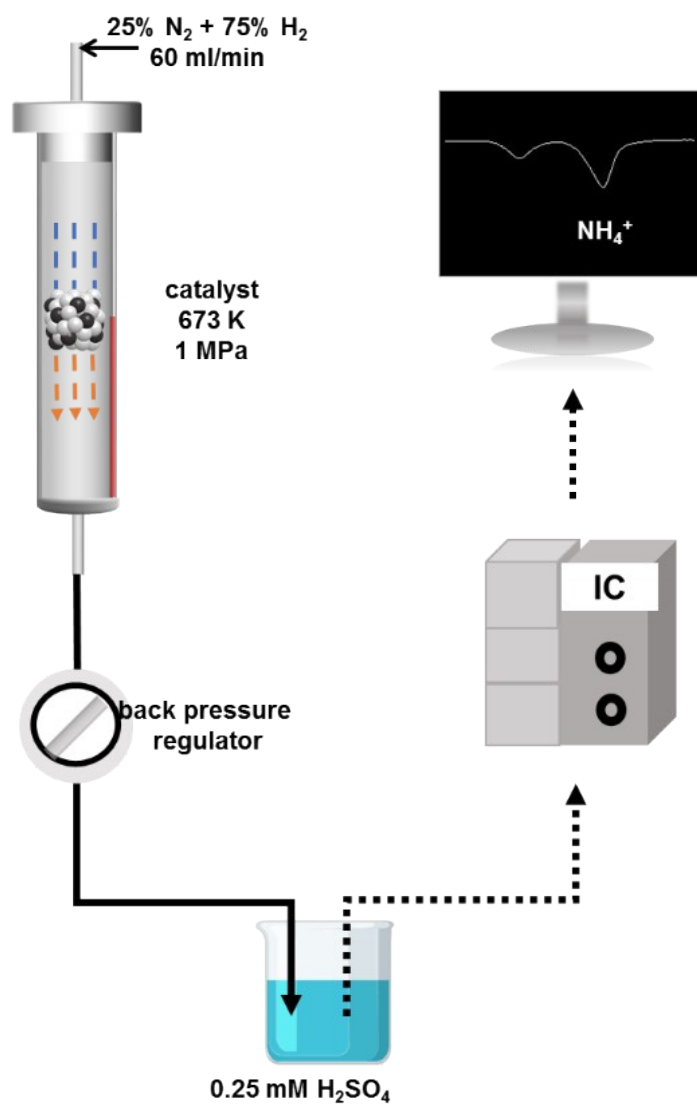

**Figure S3.** Schematic diagram of the catalytic system.



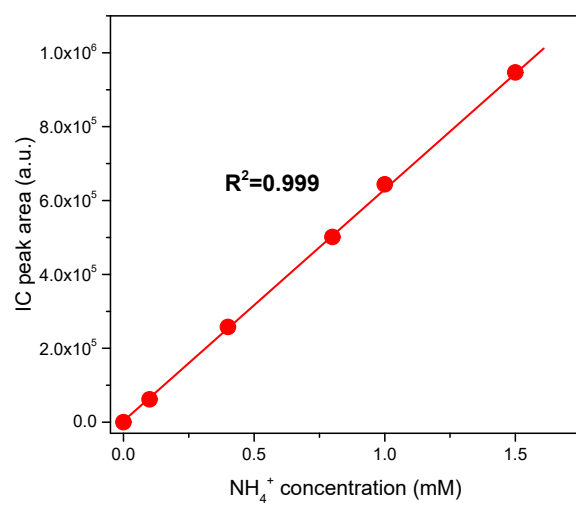

**Figure S4.** The calibration curve of NH<sub>4</sub><sup>+</sup> using the ion chromatograph method.

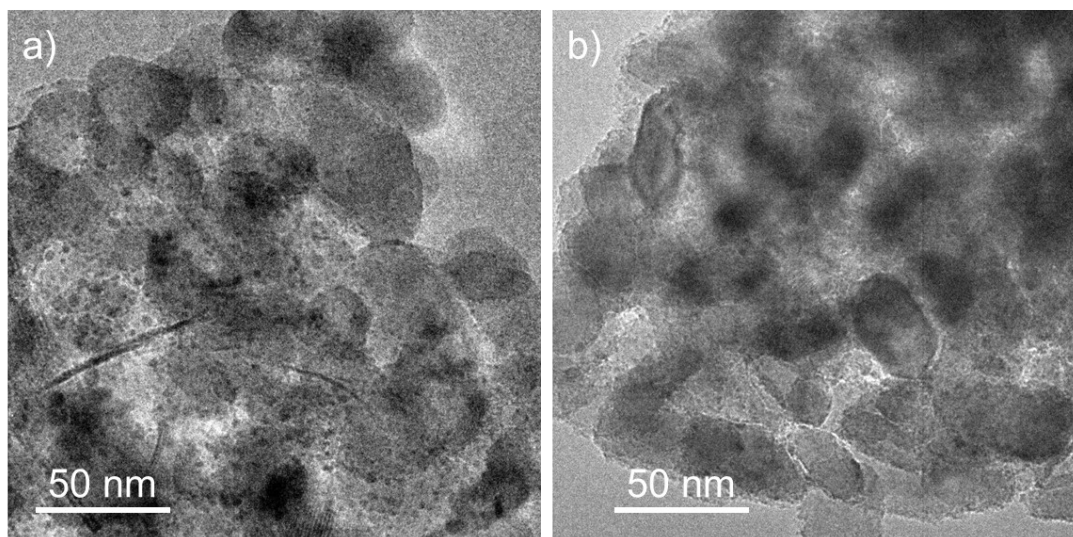

**Figure S5.** TEM images of (a) Ru-MgO and (b) Ru-TiO<sub>2</sub>/Li.

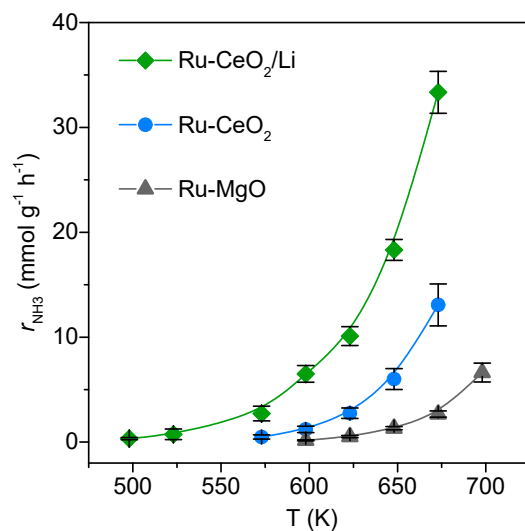

**Figure S6.** Ammonia synthesis rate as a function of temperature.

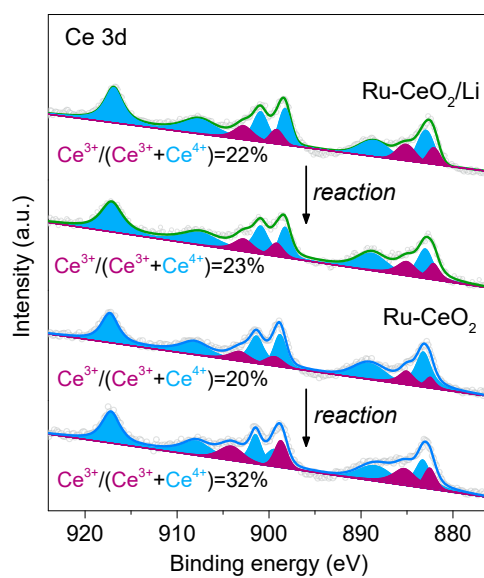

**Figure S7.** XPS spectra of Ce 3d for Ru-CeO<sub>2</sub> and Ru-CeO<sub>2</sub>/Li before and after the reactions.

## References:

1. C. Li, M. Li, Y. Zheng, B. Fang, J. Lin, J. Ni, B. Lin, L. Jiang, *Appl. Catal. B.* 2023, 320, 121982.
2. K. Sato, K. Imamura, Y. Kawano, S. Miyahara, T. Yamamoto, S. Matsumura, K. Nagaoka, *Chem. Sci.* 2017, 8, 674-679.
3. M. Kitano, Y. Inoue, Y. Yamazaki, F. Hayashi, S. Kanbara, S. Matsuishi, T. Yokoyama, S. Kim, M. Hara, H. Hosono. *Nat. Chem.* 2023, 4, 934-940.
4. J. Zheng, F. Liao, S. Wu, Glenn Jones, T. Chen, J. Fellowes, T. Sudmeier, I. McPherson, I. Wilkinson, S. Tsang. *Angew. Chem. Int. Ed.* 2019, 58, 17335-17341.
5. C. Li, Y. Shi, Z. Zhang, J. Ni, X. Wang, J. Lin, B. Lin, L. Jiang. *J. Energy Chem.* 2021, 60, 403-409.
6. Y. Lu, J. Li, T. Tada, Y. Toda, S. Ueda, T. Yokoyama, M. Kitano, H. Hosono. *J. Am. Chem. Soc.* 2016, 138, 12, 3970–3973.
7. B. Lin, Y. Wu, B. Fang, C. Li, J. Ni, X. Wang, J. Lin, L. Jiang. *Chin. J. Catal.* 2021, 42, 10, 1712–1723.
8. J. Feng, L. Liu, X. Ju, M. Wang, X. Zhang, J. Wang, P. Chen. *ACS Sustain. Chem. Eng.* 2022 10, 31, 10181-10191.
9. M. Kitano, Y. Inoue, H. Ishikawa, K. Yamagata, T. Nakao, T. Tada, S. Matsuishi, T. Yokoyama, M. Hara, H. Hosono. *Chem. Sci.* 2016, 7, 7, 4036-4043.
10. M. Hattori, T. Mori, T. Arai, Y. Inoue, M. Sasase, T. Tada, M. Kitano, T. Yokoyama, M. Hara, H. Hosono. *ACS. Catal.* 2018, 8, 12, 10977-10984.
